# Supplementary material for: Abnormal Lipid Droplets Accumulation Induced Cognitive Deficits in Obstructive Sleep Apnea Syndrome Mice via JNK/SREBP/ACC Pathway but Not Through PDP1/PDC Pathway
Source: Research Square preprint supplement (doi:10.21203/rs.3.rs-648813/v1), 2021-06-29
Supplement: Supplementary file 1 [file d60b783898157f67ddfe7b94.docx]

**Supplement**

**Abnormal lipid droplets accumulation induced cognitive deficits in obstructive sleep apnea syndrome mice via JNK/SREBP/ACC pathway but not through PDP1/PDC pathway**

Dongze Li*1, Yan Yu*#1, Na Xu*1, Wanting Li1, Yanyan Hou1, Xi Wang2, Yeying Sun1, Wenxue Lu1, Guiwu Qu#1, Changjun Lv#1, Fang Han#1


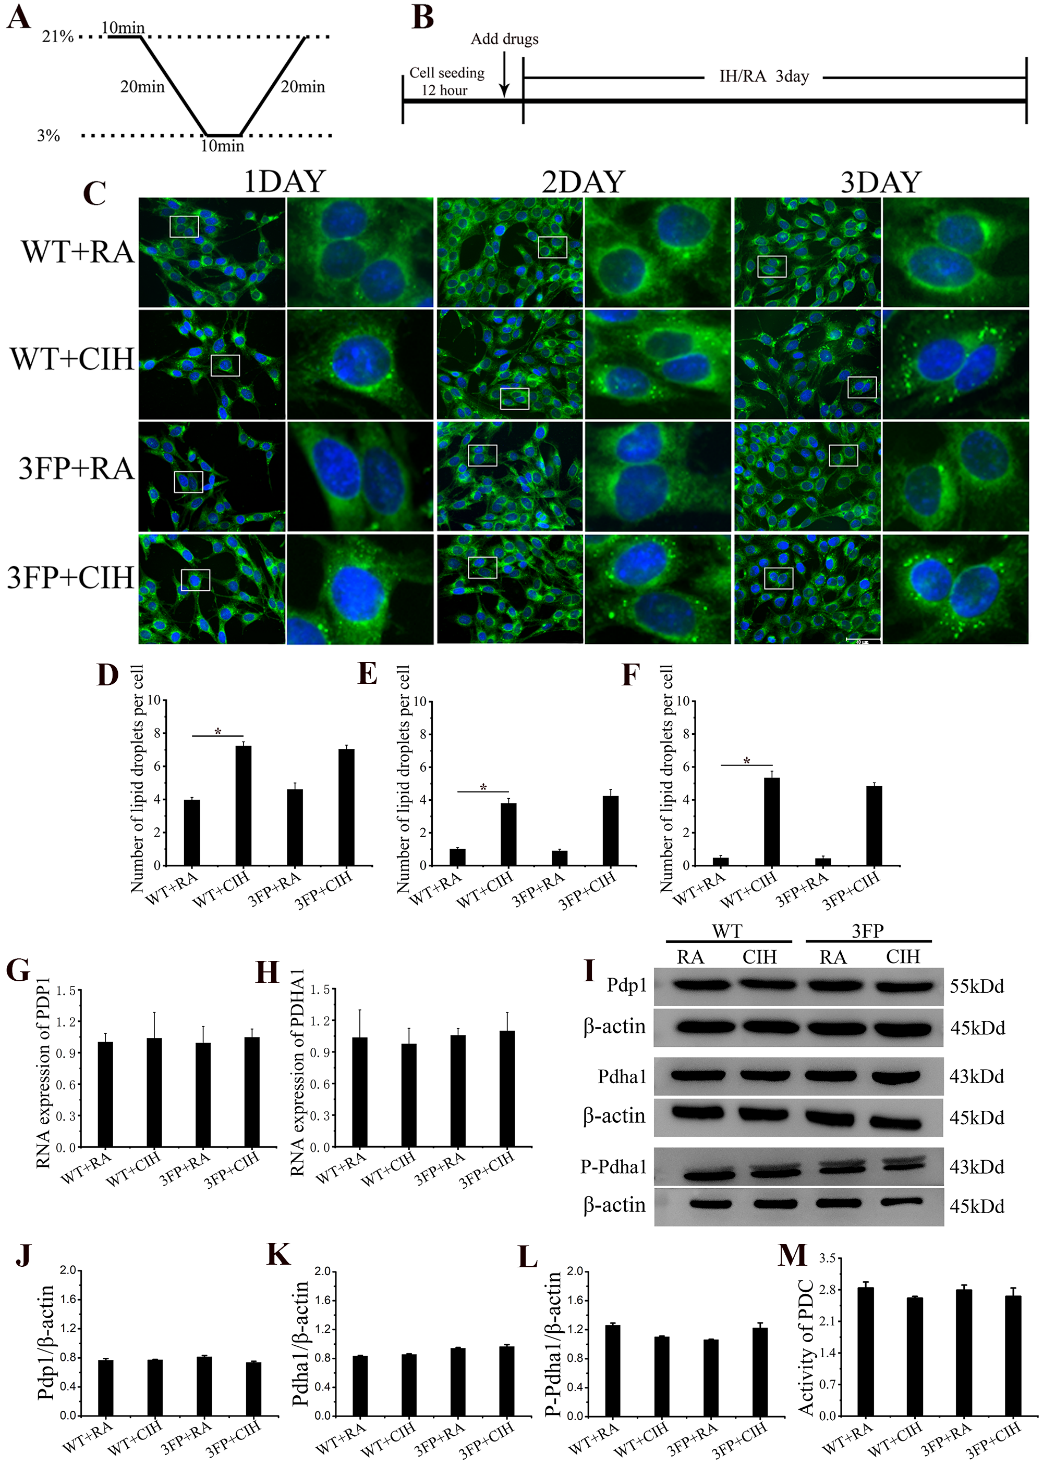


**Supplement. 1.** **CIH treatment did not significant influence the expression of PDP1/PDHA1 in *vitro.*** (A, B) The IH program and the sequence of experiment process. (C) BODIPY (green) and DAPI (blue) staining of the HT22. Magnification:600×. (D-F) The number of LDs per cell. Compared with the NC group, the number of LDs in the IH group were obviously increased. However, treated with 3-FP could not reduce the number of LDs. (G, H) Quantitative real-time PCR experiments showed the expression levels of PDP1 and PDHA1 in Ht22 cells. The results showed no statistically difference among four groups. (I-L) The PDP1/PDHA1 pathway was activated by Western blot, and no statistically difference among four groups. (M) The activity of PDC and no significant difference could be found. All experiments were repeated three times. Data are expressed as the mean ± SEM. Statistical analysis was performed through two-way ANOVA. The treated samples were different from the controls at p < 0.05.
